# Supplementary material
Source: publisher figshare collection journal article supplement (https://sage.figshare.com/ndownloader/files/12844145)
Supplement: Supplementary file 1 [file 12844145]

## Sheet: Target_and_Sentences
Supplemental Material for:
Person-Based Organisation in Working Memory
Sho Ishiguro and Satoru Saito
Supplemental Material 2
List A
Target	Sentence	Translated Target	Translated Sentence
プラチナ	人物はプラチナの価格推移に関するニュースを見た	platinum	A person watched a news program on the price trends of platinum.
もみじ	季節に関わらず、人物はもみじの葉を見に出かける	maple	Regardless of the season, a person goes to see the maple leaves.
まつげ	人物は本棚を整理していると、ホコリがまつげにかかった	eyelash	When a person tidied up a bookshelf, dust fell on the person's eyelash.
辞書	インターネットのサイトで、人物は辞書を注文した	dictionary	Through an internet website, a person ordered a dictionary.
スリッパ	人物は自分の部屋に入る前に、スリッパを履いた	slippers	Before entering the room, a person put on slippers.
タクシー	タクシーを呼んで、人物は急いで結婚式場に向かった	taxi	Calling a taxi, a person hurried to a wedding centre.
Ｔシャツ	人物は朝起きて、パジャマからＴシャツに着替えた	T-shirt	A person woke up, took off the pyjamas and changed into a T-shirt.
牛乳	風呂あがりに、人物は冷やしておいた牛乳を飲んだ	milk	After a bath, a person drank chilled milk.
ひまわり	人物はひまわりの絵を美術館でゆっくり鑑賞した	sunflower	A person spent a great deal of time appreciating a painting of a sunflower in a museum.
ベッド	ベッドに入って、人物はスマートフォンでメールを打った	bed	After lying down on the bed, a person sent an e-mail using the smartphone.
緑	近くの図書館から、人物は緑の表紙の本を借りた	green	From a nearby library, a person borrowed a book with a green cover.
うどん	人物はうどんの冷凍めんを買いだめして、冷凍庫に入れた	Udon (noodle)	A person stocked up on frozen noodles of Udon and put them in the refrigerator.
うさぎ	人物は昔、うさぎの世話をしていたのを思い出した	rabbit	A person recalled that he/she used to look after a rabbit.
みかん	人物はスーパーで、安売りになっていたみかんを一袋買った	mandarin orange	A person bought a bag of mandarin oranges at a discounted price from a supermarket.
ベルト	急いで支度したので、人物はベルトをし忘れてしまった	belt	Having dressed in a hurry, a person forgot to put on his/her belt.
ピアノ	人物は近所の人がピアノを弾いているのを聞いた	piano	A person heard a neighbour play the piano.
英語	交差点で、人物は知らない人から英語で道を尋ねられた	English	At an intersection, a person was asked the way in English by a stranger.
たわし	人物は食器の汚れをたわしで念入りにこすって落とした	sponge	A person carefully scrubbed dishes with a sponge.
ハンマー	入り用になったので、人物は物置でハンマーを探した	hammer	On needing a hammer, a person searched for it in a barn.
あじさい	初夏に、人物は近所でしばしばあじさいの花を見た	hydrangea	In early summers, a person often sees the flowers of hydrangeas in the neighbourhood.
怒り	信号無視をした人に人物は少しだけ怒りを感じた	anger	A person felt slightly angry with a person who ignored the traffic light.
砂糖	人物は砂糖入りのお菓子を食べたので、歯を念入りに磨いた	sugar	Because a person had sugared candy, he/she brushed their teeth thoroughly.
すずめ	人物が公園を通った時、すずめの群れが目に入った	sparrow	A person saw a flock of sparrows when he/she passed by a park.
台風	激しい台風が来ていたため、人物は予定を延期した	typhoon	Due to a heavy typhoon, a person postponed the schedule.
さんま	さんまを焼いていると煙が出たので、人物は換気した	Pacific saury	A person hyperventilated due to the smoke from roasting a Pacific saury.
腹痛	腹痛がしたので、人物は家でゆっくり休んでいた	stomach-ache	A person rested and relaxed at home due to a stomach-ache.
石油	人物は石油の価格が高騰しているとネット記事で読んだ	crude oil	A person read about the price rise of crude oil in an internet article.
クッキー	人物はテーブルの上を拭いて、おやつのクッキーを食べた	cookies	A person wiped a table and snacked on cookies
テレビ	テレビが故障したので、人物は修理を電話で頼んだ	TV	Because the TV was out of order, a person called for repair service.
地球	人物はスーパーで地球にやさしいエコ商品を買った	earth	A person bought earth-friendly products from a supermarket.
キツネ	人物は新しくできた動物園で、キツネの親子を見た	fox	A person saw a parent fox and its cub in a new zoo.
真珠	宝石店を横切った時、人物は真珠の指輪が目に止まった	pearl	A pearl ring caught the attention of a person as they passed by a jewellery store.
サッカー	人物はサッカーの試合を観に行くために、予定を立てた	football	A person scheduled a football match.
階段	階段を急いで降りようとしたら、人物はつまづきかけた	stairs	A person stumbled as they went down the stairs in a hurry.
日本	人物はオリンピックが日本で開催されると知った	Japan	A person heard that the Olympic games would take place in Japan.
とかげ	人物はデパートに行った際、とかげが売られているのを見た	lizard	When a person went to a departmental store, he/she saw lizards being sold.
消しゴム	掃除をしていたら、人物は机の奥に消しゴムを発見した	eraser	A person found an eraser behind the desk when they were cleaning up.
ゴキブリ	人物が明かりをつけたところ、ゴキブリが目に入った	cockroach	When a person turned on the light, he/she saw a cockroach.
ものさし	料金計算のため、人物は郵便物の大きさをものさしで測った	ruler	To calculate the fee, a person measured the size of the mail with a ruler.
胃薬	人物は胃もたれがしたので、胃薬を多めに飲んだ	stomach medicine	Because a person experienced a heavy stomach, he/she took slightly more than normal amount of stomach medicine.
アイス	人物はリビングでくつろいで、冷たいアイスを食べた	ice cream	A person relaxed in the living room and had an ice cream.
キャベツ	人物は定食屋に行って、キャベツ大盛りを注文した	cabbage	A person went to a diner and ordered an extra-large portion of cabbage.
List B
Target	Sentence	Translated Target	Translated Sentence
アルミ	人物は固く絞った雑巾でアルミのサッシを拭いた	aluminium	A person wiped an aluminium sash with a tightly wrung-out dust cloth.
さくら	さくらが咲き始めたので、人物はお花見を計画した	cherry	Because the cherries started to blossom, a person planned to go cherry blossom viewing.
おでこ	風邪を引いたので、人物はおでこに冷却シートを貼った	forehead	On having a cold, a person put a cooling gel sheet on the forehead.
絵本	人物は注文していた絵本を、宅配便で受け取った	picture book	A person received the picture book they ordered.
サンダル	サンダルを履いて、人物は遊園地へ遊びに行った	sandals	A person went to play in an amusement park after putting on their sandals.
自転車	人物は自転車を駐輪場に止めて、カギをしっかりとかけた	bicycle	A person parked the bicycle in a parking lot and made sure to lock it.
ズボン	人物は干していたズボンを家に取り込み、畳んだ	pants	A person took in the hung pants and folded them.
コーラ	暑いので、人物は自動販売機でコーラの一缶を買った	cola	Because it was hot, a person bought a can of cola from a vending machine.
たんぽぽ	人物が散歩をしていると、道端にたんぽぽを見つけた	dandelion	A person found a dandelion on the street while strolling.
机	人物は机の上でうつ伏せになって、うたた寝をした	desk	A person laid with their face down on the desk and took a nap.
ピンク	ピンクのバスに乗るため、人物はバス停で待ち合わせをした	pink	To board the pink bus together, a person had a rendezvous at a bus stop.
ラーメン	人物は近所で美味しいラーメンが食べられるお店を探した	ramen (noodle)	A person looked for a delicious ramen shop in the area.
にわとり	人物は学校で、にわとりを飼っていたことを思い起こした	chicken	A person recalled looking after a chicken at his/her school.
バナナ	ジョギングの後に、人物はバナナで栄養補給した	banana	After jogging, a person had a banana for adequate nutrition.
時計	時計を見て、人物は帰り支度を始めようと思った	clock	Taking a glance at the clock, a person thought of getting ready to go home.
ギター	人物はギター音楽を携帯ミュージックプレイヤーで聞いた	guitar	A person listened to a guitar track on a portable music player.
国語	人物は国語の重要性についての新聞記事を読んだ	national language	A person read an article in the newspaper about stressing the importance of the national language.
スプーン	人物はインスタントコーヒーを溶かし、スプーンで混ぜた	spoon	A person dissolved instant coffee and stirred it with a spoon.
のこぎり	ホームセンターで、人物は小さなのこぎりを買った	saw	At a DIY store, a person bought a small saw.
コスモス	花屋の店先で、人物はコスモスの花束を見つけた	Cosmos bipinnatus	Outside a flower shop, a person found a bunch of Cosmos bipinnatus.
喜び	誕生日を祝ってもらい、人物は非常に喜びを感じた	happy	A person was extremely happy as they celebrated their birthday.
しょうゆ	料理に隠し味として、人物はしょうゆを少々加えた	soy sauce	As a secret ingredient, a person put a little drop of soy sauce into the dish.
カラス	ごみがカラスにあさられないように、人物はネットをかけた	crow	To prevent crows from rummaging the garbage, a person put a crow-proof net over it.
雷	人物が夕涼みをしていると、雷が鳴ったので部屋に戻った	thunder	While a person was enjoying the evening breeze, thunder rumbled and he/she returned to the room.
マグロ	人物はスーパーのチラシでマグロの特売を知った	tuna	A person learned about a sale on tuna from a supermarket flyer.
頭痛	夜更かしをしたので、人物は少しだけ頭痛がする	headache	A person had a headache due to staying up late.
ガソリン	車にガソリンを入れ、人物は料金を店員に支払った	gasoline	After refilling the car with gasoline, a person paid the cashier.
ケーキ	人物は手をきれいに洗って、それからケーキを食べた	cake	A person washed their hands vigorously and ate a cake.
カラオケ	ひょんなことから、人物はカラオケに誘われることになった	karaoke	On strange occasions, a person was invited for karaoke.
太陽	太陽の光が眩しいので、人物はカーテンを広げた	sun	A person closed the curtains as the sunlight was very bright.
ライオン	人物は野生のライオンの映像をネットで見た	lion	A person watched a video of a wild lion on the internet.
ダイヤ	人物はダイヤの発掘に関する映画を観てみた	diamond	A person tried to watch a movie about diamond mining.
野球	人物は電車を乗り継いで、野球を見に出かけた	baseball	A person changed the train lines to go for a baseball game.
玄関	外出する前に、人物は玄関で新しく買った靴を履いた	entrance	Before going outside, a person put on new shoes at the entrance of the house.
アメリカ	人物はアメリカの州をネット上の地図で確認してみた	The U.S.	A person looked for a state on the map of the U.S.
カエル	人物が夜道を歩いていると、カエルの鳴き声が聞こえた	frog	While walking on the street at night, a person heard frogs croaking.
えんぴつ	人物は普段はキーボードで書くので、えんぴつは使わない	pencil	Because a person usually uses the keyboard, he/she does not use pencils.
トンボ	人物は空を見上げて、トンボが飛んでいるのを見た	dragonfly	A person looked up and saw a dragonfly flying.
メジャー	模様替えのため、人物はメジャーで家具の大きさを測った	measure	To rearrange the room, a person measured the sizes of furniture with a measuring tape.
目薬	パソコン画面を長時間見た後に、人物は目薬をさした	eye-drops	After having seen the PC display, a person used eye-drops.
紅茶	喫茶店に行き、人物はお菓子を食べて紅茶を飲んだ	black tea	A person went to a cafe and had a dessert and a cup of black tea.
ジャガイモ	人物はジャガイモをむいて、皮をゴミ箱に捨てた	potato	A person peeled the potatoes and threw the potato skins into the garbage bin.

## Sheet: Occupational_List
List 1
Occupation	Translated Occupation
先生	teacher
サラリーマン	white-collar worker
医者	doctor
運転手	driver
魚屋	fish merchant
農家	farmer
銀行員	bank staff
床屋	barber
ホステス	hostess (at hostess clubs)
通訳	interpreter
職人	craft-worker
美容師	beautician
List 2
Occupation	Translated Occupation
政治家	politician
セールスマン	salesman
俳優	actor/actress
八百屋	greengrocer
警察官	police officer
事務員	desk worker
大工	carpenter
作家	writer
会計士	accountant
ジャーナリスト	journalist
菓子屋	sweet shop owner (shopkeeper)
船員	sailor

## Sheet: Sentences_Exp4
List A
Sentence	Translated Sentence
果物を食卓に加えると、食卓に色取りが生まれた	Adding a fruit made the table colourful.
果物を自分で栽培するのは決して簡単なことではない	It is not easy to grow a fruit by yourself.
やり方さえわかれば、果物からお酒も造れるかもしれない	If the method is known, one may be able to make alcohol from a fruit.
果物の栄養価をインターネットで調べてみる	One checks the nutrition information of a fruit on the internet.
果物を使って自家製のジャムを作るのはいい考えだ	Making homemade jam from a fruit is a good idea.
聞くところによると、最近は果物が豊作らしい	They say that the harvest of a fruit has been large in the recent years.
果物を食べると、控えめではあるがほのかに甘い香りがした	A fruit has a subtle sweet smell although it was not strong.
果物は、昼食の後のデザートとして一切れ食べられた	A piece of a fruit was eaten as dessert after lunch.
果物を食べた際に、似た味の薬を思い出してしまった	Eating a fruit reminded me of one of the medicines that had a similar taste.
果物は色が美しいので食べるのはもったいないくらいだった	The colour of a fruit was very beautiful and looked too good to be eaten.
急用ができたので、果物を手土産として持って行こう	Since it is urgent, one will take a fruit as a gift.
果物を料理に入れエスニックな味付けにする	Adding a fruit to the dish makes it an ethnic food.
果物はアロマにも使うことができるかもしれない	A fruit may be used for its aroma for relaxation.
果物はドラッグストアには置いていないだろう	A fruit may not be available at the drug store.
果物はダイエットのために食べるのは良いと思う	One thinks that having a fruit is good in a diet regimen.
カメラの使い方の練習のため、果物を被写体に撮影する	To practice using a camera, pictures of a fruit were taken.
果物を使ったゼリーは若い人の間で大変人気がある	Fruit jellies are quite popular among the young generation.
果物は悪天候に弱いので、今年の収穫量は見込めない	Because the harvest of a fruit depends on the weather it is not expected to be good this year.
籠の中にある果物は珍しいもので、あまり流通していない	Fruits in the basket are rare and not distributed well.
果物は子供のおやつにもちょうど良いだろう	A fruit is also appropriate as a snack for children.
果物をお酢につければフルーツビネガーも作ることができる	By putting a fruit in vinegar, one will get fruit vinegar.
机にある果物は、果物狩りで大量に採ったものである	Many fruits on the table were taken for fruit picking.
果物は、近所の方におすそ分けで少し配ろう	Some of the fruits will be shared with neighbours.
果物を放っておいたら腐ってしまうので、腐る前に食べよう	A fruit should be eaten before it gets spoiled
果物について深く知るため、図鑑を見て勉強する	Looking at a pictorial book enables one to learn deeply about a fruit.
果物を長期保存する際に、直射日光は避けるべきだ	In order to keep a fruit fresh for a long time, direct sunlight should be avoided.
果物は今まさに旬であり、美味しくいただける	A fruit is now in season, and it tastes good.
果物は痛まないように、クール便で配送しなければならない	To ensure that a fruit does not go bad, it should be delivered by refrigerated courier service.
果物は思ったよりも可食部は少なめで、ゴミが多く出る	The editable portion of a fruit was smaller than expected, and it yielded a lot of wastes.
果物で二日酔いの症状を緩和できるかもしれない	A fruit might mitigate the symptoms of the hangover.
果物には、アレルギー症状を引き起こす可能性がある	A fruit can cause allergy.
果物には、小さなものも大きなものもあったようだ	There seemed to be large and small sizes of a fruit.
果物は爽快な気分にしてくれるので目覚めにぴったりだ	A fruit is good as an awakener as it is refreshing.
ある地域では、果物は名産品としても親しまれるようだ	A fruit might be considered popular as the speciality of a region.
果物はフルーツカービングに適していないかもしれない	Certain fruits may not be appropriate for fruit-carving.
果物を見た時、アロハシャツの柄にもなると思った	Looking at a fruit made one think that it could be used as a motif for Hawaiian shirts.
果物の種を庭に蒔いてもきちんと成長するかはわからない	Planting seeds of a fruit alone does not assure that they will grow properly.
果物の香りのする新しい芳香剤が開発中らしい	They say that a new deodorant with the fragrance of a fruit is being developed.
食べごろでない果物は味が薄いので美味しくない	A fruit that is not ripe does not have much flavour and tastes bad.
果物を乾燥させてドライフルーツを作ってみた	One tried making dried fruit by drying a fruit.
鮮やかな果物の色は見ているだけで楽しいものだ	The vibrant colour of a fruit is fun to look at.
果物を食べると歯が痛くなったので、あまり食べられない	One cannot have much fruit if their tooth hurts while eating a fruit.
List B
Sentence	Translated Sentence
食べやすいように、果物をナイフで切って小分けにする	A fruit was sliced into bite-sized pieces to be eaten easily.
果物のいくつかには、独特の香りを持つものもあった	Some fruits have a unique smell.
果物は無農薬だったので、少し虫が付いていた	Because a fruit was organic, it was infested with insects.
果物には好き嫌いがあるので、相手を選ぶ贈り物になる	Because fruits are loved by some and not liked by others, it is not for everyone as a gift.
最近、果物は品種改良されて種類が多く増えている	Fruits have been improved, and there is a variety of them.
果物は衝撃に弱いので、丁寧に扱う必要がある	As a fruit is weak to shock, it should be treated gently.
果物が砂糖漬けができれば、今食べなくても済む	If a fruit can be preserved in sugar, it does not have to be eaten now.
果物は調理しなくても生のままで食べられるらしい	A fruit does not need to be cooked and can be eaten raw.
果物は、仏壇の供え物として使うことができるかもしれない	A fruit can be used as an offering to the Buddhist altar.
果物は冷え症には良くないので食べすぎには注意しよう	As a fruit can cause excessive sensitivity to cold, do not eat too much of it.
果物には、たくさんの食物繊維が含まれている	Fruits are high in fibre
果物を新鮮なうちに絞ってジュースにしてみよう	A fruit is juiced when it is fresh.
子どもたちは果物が大好きで早く食べたがった	Children like fruits and wish to eat it soon.
果物は日本以外の国でも利用されているものだそうだ	Fruits are said to be used outside Japan too.
果物をケーキのトッピングとして少々加えてみた	One topped a cake with some pieces of a fruit.
果物をスケッチの対象として詳細に写生した	A fruit is sketched in detail as an object of practice.
果物で生活習慣病を予防できるかもしれない	A fruit may help someone with lifestyle-related diseases.
果物の栽培は害虫や鳥害から守るのが難しいとされる	Cultivating a fruit is difficult to protect it from insects and birds.
果物を食べる際に、少し食べかすが服に付いてしまった	When one was eating a fruit, the clothes caught a little of the food particles.
家にある果物は海外から輸入されたものである	The fruits at one's home were imported from abroad.
朝食を果物だけにしたら、少し物足りないかもしれない	Perhaps, eating nothing but a fruit for breakfast is not enough.
果物は、スーパーマーケットの特売で買ったものだ	A fruit was bought on sale at the supermarket.
果物は、野生動物にもよく食べられる種類らしい	Fruits seem to be eaten by wild animals.
果物が食べ頃かどうか確認しておいたほうがよさそうだ	It is better to make sure if a fruit is ripe enough to eat.
果物は時期によって生産量が変化し手に入りやすさが変わる	The quantity of fruit depends on the season and the availability changes.
果物は少し冷やして食べると美味しいと聞いた	A fruit is good when it is cooled a little.
果物は値段が高いので買いすぎには注意しよう	As the price of fruits is high, be careful not to buy a lot.
果物は水分を多く含むので、水分補給にも役に立つだろう	It is rich in water, and it helps in rehydration.
果物は輸入する時に検疫にかけられているらしい	The fruits were quarantined as they were imported.
果物は近所の八百屋にも売られているようなものだ	A fruit is something that would be sold at the nearby greengrocer.
果物を使った飲料が旅先の道の駅で売られていた	A drink made from a fruit was sold at a roadside station.
果物を一人で毎日少しずつ食べていくのは大変だ	Eating a few fruits every day is difficult.
果物はヨーグルトの中に入れると、とても美味しい	A fruit goes perfectly with yoghurt.
喜ばれると思うので、果物はお見舞いの際に持って行こう	One should carry fruits to the hospital because it might please the patient.
果物は健康に良いと思うので残さず食べよう	A fruit is good for health and should be consumed.
果物で赤ちゃんの離乳食を作ることができるか確認した	One should make sure if a fruit can be used as weaning food or not.
果物の皮は食べたくないので、皮を丁寧に剥く	One does not eat fruit peel and therefore, peels it.
果物を夕食のサラダに入れてみると味のアクセントになった	Adding a fruit to the salad for dinner added a kick of taste.
果物をすりつぶしスムージーを作って朝ごはんにする	One mashes a fruit and makes breakfast.
家の冷蔵庫で果物を保管しておけば、いつでも食べられる	Storing a fruit in the refrigerator at home will make it available at all times.
果物は時期によって値段が変わるので安い時に買うのが良い	It is better to buy a fruit when the price is low because it can depend on the season.
果物からシロップを作ってみたが用途がわからない	One made syrup from a fruit but does not know what it is used for.
Note. Because Japanese language is a pro-drop language, "one" in translated sentences is dropped in original Japanese sentences.

## Sheet: Fruit_List
Fruit List 1
Fruit	Translated fruit name
カキ	Japanese persimmon
バナナ	banana
もも	peach
マンゴー	mango
リンゴ	apple
メロン	melon
グレープフルーツ	grapefruit
ざくろ	pomegranate
夏みかん	Natsumikan (summer tangerine)
スイカ	watermelon
あけび	Akebi quinata (chocolate vine)
サクランボ	cherry
Fruit List 2
Fruit	Translated fruit name
ナシ	pear
ミカン	mandarin orange
クリ	chestnut
イチジク	fig
レモン	lemon
ぶどう	grape
パイナップル	pineapple
びわ	loquat
パパイヤ	papaya
イチゴ	strawberry
スモモ	prune
オレンジ	orange
